# Supplementary material for: Characterization and diagnostic value of the gut microbial composition in patients with minimal change disease
Source: Frontiers journal article supplement (doi:10.3389/fphys.2022.1070569), 2022-12-06
Supplement: Data_Sheet_1.zip [file Data_Sheet_1.zip]

## Sheet: genus.Kruskal-Wallis_rank_sum.A
ID	UMCD.mean	UMCD.se	TMCD.mean	TMCD.se	HC.mean	HC.se	p-value	Sig_mark
Bacteroides	0.133324	0.0244522	0.19643	0.0302199	0.257034	0.0198258	8.72836e-05	***
Faecalibacterium	0.110028	0.0215719	0.173275	0.0235559	0.125348	0.0108578	0.0249323	*
Prevotella	0.0409811	0.0164452	0.0562629	0.0234529	0.116621	0.0199336	0.542043
Escherichia-Shigella	0.124459	0.0356385	0.117596	0.0338567	0.0229083	0.00749242	3.26207e-06	***
Subdoligranulum	0.0522574	0.00888156	0.0637866	0.0111978	0.0178574	0.0020796	0.00867069	**
Lachnospiraceae_unclassified	0.0179906	0.00308071	0.0231332	0.002747	0.0506181	0.00417525	1.05823e-10	***
Blautia	0.0376028	0.00861492	0.0258079	0.00508706	0.0340531	0.00319687	0.0925091
Megamonas	0.0235387	0.0147072	0.0317174	0.011034	0.0348366	0.00999411	0.756034
Agathobacter	0.0148956	0.00325883	0.0198101	0.00368207	0.0264755	0.00280862	0.00165656	**
Bifidobacterium	0.0360626	0.00733805	0.0165919	0.00397635	0.0125072	0.0024458	0.00796086	**
[Eubacterium]_coprostanoligenes_group	0.0128695	0.00740892	0.0124662	0.00455804	0.0115058	0.00244659	0.302089
Alistipes	0.00695211	0.00232369	0.0135354	0.00391809	0.0134128	0.00186391	0.0179815	*
Roseburia	0.0109298	0.00311172	0.0104145	0.00219478	0.0124711	0.00156183	0.00638024	**
Dialister	0.00368751	0.00165123	0.00605329	0.00191455	0.0172548	0.00321859	0.0217054	*
Oscillospiraceae_UCG-002	0.00553313	0.0019343	0.0100057	0.00284171	0.0142295	0.00263668	0.374195
Enterobacteriaceae_unclassified	0.0236575	0.0108336	0.0115678	0.00445163	0.00295347	0.00147128	0.000398986	***
Klebsiella	0.00751473	0.00253643	0.0253637	0.00992774	0.00354065	0.00119877	0.0600311
Lachnospira	0.00182429	0.000654105	0.00199542	0.000452146	0.0178947	0.0040386	4.64396e-14	***
Clostridiaceae_Clostridium_sensu_stricto	0.0166585	0.00882648	0.00450347	0.00182804	0.00812224	0.00412654	0.242125
Parabacteroides	0.00938651	0.00294859	0.00897609	0.00208051	0.00816169	0.00115413	0.333489
Lachnoclostridium	0.0042392	0.00098146	0.0077678	0.00161373	0.0104241	0.00199307	1.69813e-05	***
[Eubacterium]_hallii_group	0.0154426	0.00400141	0.0043376	0.0011002	0.00553274	0.000704852	0.216624
[Ruminococcus]_torques_group	0.0152869	0.0043927	0.00577813	0.00158563	0.00465662	0.00122373	0.178059
Phascolarctobacterium	0.00573256	0.0018301	0.00720942	0.00166159	0.00780564	0.00130013	0.186374
Dorea	0.0135226	0.00322505	0.00522933	0.000968205	0.00420212	0.00053653	0.146487
Anaerostipes	0.00651162	0.00216595	0.00723893	0.00211001	0.00634138	0.00115556	0.0726304
Erysipelotrichaceae_UCG-003	0.0156641	0.0092689	0.00595813	0.00199292	0.0022291	0.00028356	0.187795
Ruminococcaceae_CAG-352	0.00807493	0.0041307	0.008799	0.00587283	0.00303995	0.00119373	0.953571
Enterococcus	0.021693	0.0095487	0.000156622	6.03361e-05	0.000244714	0.000146958	0.000279413	***
[Eubacterium]_eligens_group	0.00158669	0.000569488	0.00260022	0.000783417	0.00865332	0.00158596	2.22504e-05	***
Streptococcus	0.0137133	0.00337172	0.00406913	0.000911029	0.00181778	0.00065858	5.42488e-07	***
Parasutterella	0.00269204	0.000929567	0.00271447	0.00163254	0.00788991	0.00203553	7.33863e-07	***
Ruminococcus	0.00190911	0.000707327	0.00286682	0.000651358	0.00780437	0.00181403	0.00127893	**
[Ruminococcus]_gnavus_group	0.00988062	0.00618882	0.0062982	0.00226046	0.00197082	0.000590727	0.269877
Alloprevotella	0.00358893	0.00280723	0.00419233	0.00305319	0.0061167	0.00365037	0.227449
Romboutsia	0.00971582	0.00298053	0.00496669	0.00212285	0.00266181	0.000488507	0.993997
Fusicatenibacter	0.00197924	0.00059159	0.00169769	0.000441778	0.00785795	0.00130197	4.97464e-06	***
Lachnospiraceae_NK4A136_group	0.00349287	0.000792441	0.00574104	0.00149029	0.00405362	0.000723701	0.729021
Clostridia_UCG-014	0.000450622	0.000348481	0.0062276	0.00327258	0.005278	0.00147978	0.0897443
Coprococcus	0.00131709	0.000319547	0.00488322	0.00184228	0.00527852	0.00117172	0.0596166
Veillonella	0.00750587	0.00314893	0.0052542	0.00156351	0.00150519	0.000911349	0.000806482	***
Christensenellaceae_R-7_group	0.00288249	0.00126811	0.00415389	0.00145606	0.00406638	0.00128607	0.782619
Ruminococcaceae_unclassified	0.00587444	0.00184312	0.00242764	0.000665403	0.00295249	0.000387625	0.0227349	*
Oscillospiraceae_UCG-005	0.00149573	0.0009899	0.00342124	0.00145353	0.00351974	0.000775011	0.161526
Megasphaera	0.000766556	0.000434432	0.00158076	0.000597741	0.00471468	0.00211154	0.668887
Muribaculaceae	0.00301773	0.00219855	0.00205131	0.00144398	0.00302182	0.000812004	0.562056
Holdemanella	0.00852316	0.00488997	0.000331844	0.000172604	0.000732516	0.000241973	0.082833
Haemophilus	0.00585818	0.00302493	0.00327949	0.00187612	0.00058567	0.000173691	0.263289
Weissella	0.00982116	0.00608351	0.000135244	7.11267e-05	5.18352e-05	3.4071e-05	2.72722e-06	***
[Eubacterium]_ruminantium_group	7.56222e-05	4.29616e-05	0.00115893	0.000472728	0.00398465	0.0015492	0.55166
Collinsella	0.00505862	0.00177987	0.00132938	0.000414439	0.00140175	0.000466415	0.66029
Lactobacillus	0.00498907	0.00260324	0.000694356	0.000269022	0.00165403	0.00077466	0.0650275
Sutterella	0.000649267	0.000246375	0.00112816	0.000328089	0.0035124	0.000628612	0.000689326	***
Pediococcus	0.00884002	0.00872217	0	0	0	0	0.000441457	***
Oscillospiraceae_NK4A214_group	0.000669422	0.000337046	0.0027112	0.000822941	0.00269875	0.000485103	0.0081066	**
Clostridia_unclassified	0.00101847	0.000353411	0.00172782	0.000289408	0.00255263	0.000302393	4.47692e-05	***
Intestinibacter	0.00546424	0.00374114	0.000461956	8.63796e-05	0.000954747	0.000286646	0.922415
Butyricicoccus	0.00150876	0.000300563	0.00177151	0.000311055	0.00222796	0.000281974	0.00307421	**
Flavonifractor	0.00204858	0.00117932	0.00309696	0.00183897	0.000982484	0.000177994	0.224247
Akkermansia	0.00426918	0.00244208	0.000990444	0.000554202	0.00089711	0.00066365	0.101474
Aerococcus	0.0067552	0.00670548	0	0	0	0	0.00214218	**
Monoglobus	0.00251249	0.000536122	0.00146849	0.00035822	0.00132304	0.000150205	0.287643
Barnesiella	0.000383244	0.000220126	0.00155898	0.000572838	0.00230835	0.000587686	0.00806997	**
Oscillospiraceae_UCG-003	0.000767822	0.000260305	0.000719244	0.000439063	0.00250236	0.00045565	3.04248e-06	***
Lachnospiraceae_ND3007_group	0.000480244	0.000196115	0.000351156	9.10959e-05	0.00282554	0.000436685	2.87889e-08	***
Oscillibacter	0.000904911	0.000370862	0.00132936	0.000370571	0.00177632	0.000339669	0.000350411	***
Prevotellaceae_NK3B31_group	3.71111e-06	2.33174e-06	0	0	0.00262818	0.00186447	0.126952
[Eubacterium]_ventriosum_group	0.000719111	0.000385057	0.00112484	0.000256858	0.00152764	0.000239258	0.000211543	***
Desulfovibrio	0.0017314	0.00113742	0.0012158	0.000544805	0.000967879	0.000247193	0.568942
Erysipelatoclostridium	0.00349182	0.00192729	0.00120076	0.00046398	5.43077e-05	1.54751e-05	2.41618e-05	***
Paraprevotella	0.000349511	0.000145059	0.000789222	0.000255575	0.00178655	0.000368673	0.151936
Lachnospiraceae_CAG-56	0.00124702	0.000809607	0.00122178	0.00054398	0.00111223	0.000237457	0.030044	*
Bilophila	0.000642089	0.000186093	0.000862578	0.000211045	0.0014051	0.000208973	0.022237	*
Fusobacterium	0.00289458	0.00208426	0.000266089	7.74135e-05	0.000545209	0.000245161	0.473785
Ruminococcaceae_uncultured	0.000470356	0.000157515	0.0010472	0.000428672	0.00130003	0.000346596	0.137268
Lachnospiraceae_NC2004_group	0.000637044	0.000174107	0.00105153	0.000225436	0.00107859	0.000135642	0.000381077	***
Psychrobacter	0.00375947	0.00375349	0	0	0	0	1.77865e-05	***
Lachnospiraceae_UCG-001	0.0004298	0.000147641	0.000203956	4.63521e-05	0.0013474	0.000200169	5.33154e-05	***
Negativibacillus	0.00205638	0.00140108	0.000491156	0.00021886	0.00033389	0.000106797	0.205929
Stenotrophomonas	0.00312053	0.00153297	4.82222e-06	4.13769e-06	0	0	2.71154e-15	***
Lachnospiraceae_UCG-010	0.000692978	0.000330913	0.000447511	0.000102541	0.000970176	0.000149084	3.46514e-06	***
Ruminococcaceae_UBA1819	0.0010456	0.000389943	0.00127782	0.000379096	0.000347286	9.68606e-05	0.0556298
Odoribacter	0.000372533	0.000126116	0.000246	4.70309e-05	0.00115424	0.000258289	0.00258464	**
Clostridiaceae_unclassified	0.00255167	0.00226401	0.000146267	8.44874e-05	9.03626e-05	6.45338e-05	0.0616471
Tyzzerella	0.00135311	0.00108652	0.000331578	0.000117473	0.000573956	0.000142597	0.000126799	***
Ruminococcaceae_Incertae_Sedis	0.000409467	0.000105613	0.000912422	0.00014423	0.000741857	0.000115081	0.00207525	**
Coprobacter	5.46667e-05	4.48508e-05	0.000283333	0.000184142	0.00122078	0.000343206	8.44037e-05	***
Catenibacterium	0.000446244	0.00028102	0.00130796	0.000656147	0.00044078	0.000298962	0.184499
Actinomyces	0.00220702	0.00168098	0.000127978	2.2615e-05	8.44725e-05	2.02933e-05	2.55859e-06	***
Oscillospiraceae_unclassified	0.000410378	0.0001248	0.000927489	0.000437102	0.000517989	7.06197e-05	0.0542444
[Ruminococcus]_gauvreauii_group	0.00135898	0.000923018	0.000279889	5.80596e-05	0.000344846	5.25107e-05	0.842192
Lachnospiraceae_UCG-004	0.000158822	4.80342e-05	0.000270156	6.07681e-05	0.000918253	0.000108097	4.52043e-11	***
Butyricimonas	0.000252511	7.75388e-05	0.000218089	5.98843e-05	0.000877945	0.000202874	0.000963451	***
Peptostreptococcus	0.00213589	0.00212117	4.15556e-06	2.0865e-06	1.41648e-05	1.18347e-05	0.000295629	***
Anaerovoracaceae_Family_XIII_AD3011_group	0.00151947	0.000892835	0.0002998	9.71884e-05	0.000148549	2.52906e-05	0.0205172	*
Granulicatella	0.00192116	0.00178888	4.48889e-05	1.29984e-05	1.69231e-05	8.07872e-06	3.79623e-09	***
Bacteria_unclassified	0.000150933	3.34895e-05	0.000259911	4.12067e-05	0.000752637	9.19774e-05	5.73706e-08	***
Prevotellaceae_Ga6A1_group	8.31111e-06	4.99321e-06	0.0012524	0.000880949	0.000329703	0.000231766	0.297608
Prevotellaceae_uncultured	0.00140031	0.00138669	0.000238289	0.000217009	0.000115681	8.85584e-05	0.0102443	*
Turicibacter	0.000908111	0.000274004	0.000333422	0.000123414	0.000275143	0.00010071	0.369038
Colidextribacter	0.000158044	7.11278e-05	0.000242933	7.44496e-05	0.000688978	0.000139134	1.53312e-07	***
Oscillospiraceae_uncultured	0.000356178	0.000122725	0.000460844	0.000142297	0.00042367	6.84859e-05	0.0257809	*
Mitsuokella	2.77556e-05	2.73942e-05	2.72889e-05	2.72889e-05	0.000794978	0.000716273	0.799779
Oscillospirales_UCG-010	0.000438133	0.000412713	0.000353689	0.000186267	0.000430637	0.000142397	0.0145381	*
Rhodospirillales_uncultured	7.66222e-05	7.5494e-05	7.45333e-05	5.68359e-05	0.000745769	0.000638734	0.0275371	*
Lachnospiraceae_uncultured	0.000954333	0.000265982	0.000300067	7.94093e-05	0.00014422	2.51466e-05	0.375547
Firmicutes_unclassified	0.000217778	8.87443e-05	0.000435156	0.000135046	0.000435923	7.39531e-05	0.00664425	**
[Eubacterium]_xylanophilum_group	8.6e-05	8.54327e-05	0.000281044	0.000201372	0.000497165	0.000181581	0.000852068	***
Sphingomonas	0.000548911	0.000528391	0.000516533	0.000490523	0.000146868	3.51499e-05	3.1434e-06	***
[Eubacterium]_siraeum_group	0.000121111	9.97424e-05	0.000415578	0.000254524	0.000365033	0.000132704	0.478339
Eggerthella	0.00103924	0.000381594	0.000102889	2.75563e-05	3.98022e-05	1.0742e-05	0.000335923	***
Bacilli_RF39	0.000228333	0.000133462	0.000223689	0.000114219	0.000375022	0.000113305	0.0378152	*
Oscillospirales_unclassified	0.000277267	0.000139642	0.000410867	0.000107628	0.000257648	3.99379e-05	0.0919371
Lachnospiraceae_FCS020_group	0.000192756	5.46661e-05	0.000347667	8.21269e-05	0.000330352	4.01717e-05	0.00360248	**
Asteroleplasma	2.43556e-05	2.43556e-05	2.32667e-05	1.94652e-05	0.000558319	0.000556986	0.846175
Terrisporobacter	0.000446911	0.000235438	0.0002426	0.000105574	0.000226055	7.54825e-05	0.473452
Hungatella	0.000303067	0.000134905	0.0004698	0.000224334	0.000174154	5.66392e-05	0.366655
Bacteroidales_unclassified	8.42e-05	2.04162e-05	8.91333e-05	2.06926e-05	0.000458505	0.000121082	1.01367e-05	***
Solobacterium	0.00102284	0.000840005	5.67333e-05	1.51654e-05	8.14286e-06	2.88868e-06	6.54277e-11	***
[Clostridium]_innocuum_group	0.000375889	0.000224516	0.0002554	0.00011232	0.000156538	7.42732e-05	0.0479641	*
Allisonella	0.000173711	0.000102095	0.000273844	0.000106977	0.000213989	4.5574e-05	0.237314
Saccharimonadaceae_TM7x	0.000622689	0.000178565	0.000136667	3.8293e-05	3.08791e-05	6.73489e-06	3.79344e-09	***
Eisenbergiella	0.0005928	0.000392233	9.09778e-05	4.1818e-05	5.36154e-05	1.89614e-05	0.104784
Lactococcus	0.000718711	0.000578505	3.18444e-05	1.40478e-05	1.9044e-05	8.01937e-06	0.276821
Marvinbryantia	8.98889e-05	3.34652e-05	7.89111e-05	1.99678e-05	0.000289	5.13738e-05	2.76864e-05	***
Senegalimassilia	0.000557022	0.000221139	0.000121778	5.31536e-05	2.78352e-05	6.91164e-06	0.0537795
Saccharimonadaceae	0.000671333	0.000472341	3.32889e-05	1.13518e-05	1.0967e-05	3.19644e-06	2.45951e-06	***
Halomonas	0.000352044	0.000279398	0.000335956	0.000323803	0	0	4.48187e-05	***
Acidaminococcus	2.58222e-05	1.47845e-05	0.000376133	0.000197737	0.000141165	0.000108487	0.448284
Tannerellaceae_unclassified	0.000222378	0.000127983	9.42222e-05	4.37098e-05	0.000178198	9.41829e-05	0.884193
Peptostreptococcaceae_unclassified	0.000321222	0.000241948	4.69333e-05	1.89784e-05	0.00014022	3.14601e-05	0.0119339	*
Atopobium	0.000591511	0.00053386	1.23111e-05	3.33285e-06	5.54945e-06	2.10054e-06	2.15408e-05	***
Fournierella	0.000311311	0.000176246	7.28667e-05	7.16218e-05	9.72527e-05	4.13956e-05	0.303188
Adlercreutzia	0.000222622	0.000120915	0.000164978	0.000124505	8.83516e-05	1.57015e-05	0.0946552
Oribacterium	0.0004936	0.000436035	3.66e-05	8.56929e-06	1.37473e-05	4.40545e-06	0.000953193	***
Gastranaerophilales	0.000239311	0.000237563	6.24e-05	3.8235e-05	0.000112264	6.2217e-05	0.526275
Cellulosilyticum	0.000518178	0.000475362	0	0	2.85714e-07	2.85714e-07	0.211711
Prevotellaceae_UCG-001	0	0	0	0	0.000237681	0.00018537	0.223117
Proteus	0.000409444	0.000286221	1.64889e-05	9.62114e-06	1.62747e-05	1.54883e-05	0.276662
Coriobacteriales_Incertae_Sedis_uncultured	0.000291667	0.000172445	2.63778e-05	1.32074e-05	4.60659e-05	1.14207e-05	0.154586
Faecalitalea	0.000146778	8.72215e-05	0.000182711	0.000105557	4.02418e-05	1.25979e-05	0.777629
Holdemania	0.000104711	4.45477e-05	0.000105933	3.44722e-05	7.42418e-05	1.24582e-05	0.977797
Pseudomonas	0.000342178	0.000148657	1.66e-05	6.66783e-06	0	0	6.52383e-12	***
Peptoniphilus	6.73111e-05	3.70743e-05	4.08889e-06	1.8359e-06	0.000140934	0.000136525	0.0993722
Anaerovoracaceae_Family_XIII_UCG-001	2.98444e-05	1.32649e-05	7.11778e-05	1.90237e-05	0.000125505	2.26503e-05	0.00204808	**
Finegoldia	6.68889e-06	3.71195e-06	7.46667e-06	2.83585e-06	0.000168418	0.000167109	0.0412127	*
Lachnospiraceae_GCA-900066575	6.55778e-05	2.07693e-05	4.82667e-05	1.38135e-05	0.000117626	2.46222e-05	0.0046297	**
Anaerotruncus	2.85111e-05	1.45059e-05	0.000141022	5.52099e-05	8.53846e-05	2.49073e-05	0.00678924	**
Peptostreptococcaceae_uncultured	5.38667e-05	2.36647e-05	0.000132533	6.6622e-05	7.25714e-05	1.81205e-05	0.396868
Butyricicoccaceae_UCG-009	2.97111e-05	1.64457e-05	8.25111e-05	2.6719e-05	0.000108495	3.79168e-05	0.0873636
Lachnospiraceae_UCG-003	6.75556e-06	4.53918e-06	6.94e-05	5.2482e-05	0.00012533	9.20024e-05	0.807712
Abiotrophia	0.000315133	0.00028261	4.06667e-06	1.61289e-06	1.65934e-06	8.94321e-07	0.000466381	***
Olsenella	0.000274689	0.000254845	2.52889e-05	1.50627e-05	4.08791e-06	1.63222e-06	0.000435793	***
Rothia	0.0001744	5.83718e-05	6.61111e-05	3.30443e-05	3.26813e-05	8.59657e-06	0.0018	**
Ruminococcaceae_DTU089	6.96222e-05	4.76331e-05	0.000155667	4.42547e-05	3.62857e-05	9.38984e-06	0.0137217	*
Gemella	0.000223222	8.53908e-05	4.76667e-05	1.02168e-05	1.1978e-05	6.30557e-06	8.42397e-12	***
Saccharimonadales	0.000234356	0.000193306	2.37778e-05	7.46892e-06	6.26374e-06	1.61274e-06	0.000795078	***
Alloscardovia	0.000254133	0.000220406	5.06667e-06	4.47376e-06	0	0	0.00637382	**
[Eubacterium]_oxidoreducens_group	8.26667e-06	2.54781e-06	5.31333e-05	3.44328e-05	9.74615e-05	2.57964e-05	0.00294599	**
Rikenellaceae_RC9_gut_group	2.46667e-06	2.46667e-06	0	0	0.000119495	6.86157e-05	0.13635
Scardovia	0.000231133	0.000207363	5.22222e-06	2.09011e-06	1.52747e-06	6.91187e-07	0.000362336	***
Prevotellaceae_unclassified	8.69111e-05	6.77359e-05	1.67556e-05	9.56647e-06	6.66593e-05	2.50789e-05	0.287185
Anaerococcus	1.00444e-05	6.24257e-06	6.44444e-07	6.44444e-07	0.000104198	0.000101572	0.0329663	*
Phocea	8.47556e-05	6.93933e-05	4.46222e-05	1.9646e-05	3.7033e-05	7.75483e-06	0.0144581	*
Oxalobacter	3.15111e-05	2.36182e-05	1.42667e-05	7.2843e-06	6.67912e-05	1.83294e-05	0.0173039	*
Clostridia_vadinBB60_group	9.09333e-05	9.09333e-05	1.94222e-05	1.55481e-05	3.21099e-05	1.1287e-05	0.0296205	*
Moryella	4.54667e-05	1.78049e-05	5.90889e-05	2.25204e-05	3.46593e-05	6.73235e-06	0.587609
Butyrivibrio	0	0	3.55556e-07	3.55556e-07	8.38681e-05	8.35797e-05	0.605396
Howardella	7.24e-05	3.89917e-05	4.80889e-05	3.32227e-05	2.43407e-05	1.13418e-05	0.746017
Bacteroidales_uncultured	6.07556e-05	5.51295e-05	9.11111e-07	9.11111e-07	4.44505e-05	2.91339e-05	0.675132
Sellimonas	1.28889e-06	1.28889e-06	4.51556e-05	2.32816e-05	4.88462e-05	1.71621e-05	0.0225416	*
Aggregatibacter	0.000134778	0.000106655	9.31111e-06	3.95745e-06	5.38462e-07	5.38462e-07	0.000577927	***
Gordonibacter	0.000112978	3.7755e-05	2.26e-05	7.67788e-06	4.42857e-06	1.35524e-06	2.32744e-05	***
Cloacibacillus	5.35333e-05	4.87992e-05	8.37778e-06	5.56116e-06	3.74945e-05	1.87003e-05	0.0744991
[Clostridium]_methylpentosum_group	1.53111e-05	1.39293e-05	9.65111e-05	8.30696e-05	1.21319e-05	6.00487e-06	0.678877
Achromobacter	0.000124911	6.32115e-05	1.02667e-05	5.44972e-06	4.3956e-08	4.3956e-08	3.31632e-07	***
Chloroplast	0.000117667	5.27425e-05	2.97778e-06	1.44442e-06	6.21978e-06	3.15241e-06	2.83404e-06	***
Sphingobacterium	0.0001262	0.000125746	6.06667e-06	6.06667e-06	0	0	0.153738
Christensenellaceae_uncultured	2.01778e-05	1.77956e-05	4.17778e-05	1.79831e-05	3.45275e-05	9.01387e-06	0.0166125	*
Candidatus_Soleaferrea	3.04e-05	8.79425e-06	3.40667e-05	9.73463e-06	2.72967e-05	5.36462e-06	0.692227
Coprobacillus	2.82222e-05	1.78899e-05	2.28222e-05	1.45592e-05	3.3e-05	2.03615e-05	0.681595
Methylobacterium-Methylorubrum	8.65111e-05	4.69458e-05	2.58889e-05	2.24211e-05	1.02198e-06	6.49406e-07	0.0137375	*
Leuconostoc	7.98222e-05	3.83411e-05	1.44444e-05	5.41962e-06	8.31868e-06	3.39229e-06	0.0283032	*
Pelagibacterium	4.59556e-05	4.59556e-05	5.46889e-05	5.0578e-05	0	0	0.0121785	*
Raoultibacter	5.53556e-05	1.98151e-05	3.42e-05	2.53785e-05	3.67033e-06	1.23443e-06	0.002466	**
Providencia	2.13333e-06	1.53925e-06	9.16222e-05	9.00894e-05	1.13187e-06	8.90077e-07	0.695959
Peptostreptococcales-Tissierellales_unclassified	1.03778e-05	9.63471e-06	2.08889e-05	9.79271e-06	3.04176e-05	1.70865e-05	0.185985
Lachnoanaerobaculum	6.50444e-05	5.08024e-05	1.95333e-05	9.29671e-06	3.69231e-06	1.73506e-06	0.0424539	*
Morganella	4.44444e-07	4.44444e-07	8.28e-05	7.98746e-05	3.46154e-06	2.69813e-06	0.344173
Peptococcus	7.84444e-06	6.36197e-06	6.46667e-06	3.26314e-06	3.5022e-05	1.09948e-05	0.152297
Alcaligenes	8.09778e-05	4.73815e-05	1.33333e-06	9.32575e-07	0	0	1.54568e-07	***
Paludicola	3.18444e-05	2.80507e-05	2.96667e-05	1.39035e-05	9.89011e-06	3.27679e-06	0.127573
Porphyromonas	2.04667e-05	8.40338e-06	3.58667e-05	2.27839e-05	1.17582e-05	3.75119e-06	0.334905
[Eubacterium]_fissicatena_group	2.01556e-05	1.23048e-05	3.10444e-05	1.36227e-05	1.39011e-05	5.41693e-06	0.589007
Pelomonas	7.42889e-05	4.10754e-05	4.11111e-06	3.23151e-06	0	0	1.12646e-06	***
Paenochrobactrum	7.82667e-05	7.82667e-05	0	0	0	0	0.220665
Comamonas	1.19778e-05	1.04858e-05	3.34e-05	2.17206e-05	1.37692e-05	4.81601e-06	0.600665
Eubacterium	6.35111e-05	5.40599e-05	5.73333e-06	3.00158e-06	1.78022e-06	1.10651e-06	0.365856
Xanthobacteraceae_unclassified	6.90667e-05	3.63834e-05	0	0	2.41758e-07	2.41758e-07	5.96669e-09	***
[Eubacterium]_nodatum_group	4.69556e-05	2.95165e-05	1.82444e-05	9.41577e-06	1.84615e-06	9.32119e-07	0.000589174	***
Kocuria	6.78889e-05	6.36075e-05	0	0	0	0	0.00214218	**
Oscillospira	3.8e-06	2.27871e-06	1.11333e-05	8.09381e-06	2.59121e-05	6.15289e-06	0.00206018	**
Vagococcus	4.72444e-05	2.27479e-05	1.94222e-05	1.94222e-05	0	0	0.000693013	***
Phyllobacterium	1.97778e-05	1.49686e-05	4.58889e-05	3.23946e-05	0	0	0.00113522	**
Anaerofilum	3.44444e-06	2.76076e-06	2.58889e-05	1.29508e-05	1.72527e-05	5.564e-06	0.281087
Christensenella	2.82667e-05	1.46484e-05	1.85556e-05	1.0009e-05	8.21978e-06	2.09545e-06	0.66927
Peptococcaceae_uncultured	8.22222e-06	8.22222e-06	9.33333e-06	6.5305e-06	2.24725e-05	8.52143e-06	0.0402014	*
Leptotrichia	5.59778e-05	5.32865e-05	6.06667e-06	3.94462e-06	3.95604e-07	3.95604e-07	0.145899
Victivallis	8.44444e-07	8.44444e-07	9.33333e-07	9.33333e-07	2.85055e-05	1.00474e-05	0.00401786	**
Fenollaria	2.01333e-05	1.15325e-05	1.66889e-05	7.77401e-06	1.0978e-05	5.06008e-06	0.870113
Corynebacterium	4.66889e-05	2.28983e-05	4.86667e-06	2.36549e-06	3.40659e-06	1.41671e-06	0.00107869	**
Lysinibacillus	0	0	5.79111e-05	5.79111e-05	0	0	0.220665
Parvimonas	4.07778e-05	1.57047e-05	4.46667e-06	1.98672e-06	3.84615e-06	3.84615e-06	5.09048e-05	***
Desulfovibrionaceae_uncultured	1.27778e-05	7.47703e-06	5.22222e-06	4.14082e-06	1.72088e-05	8.76467e-06	0.653019
Acinetobacter	4.37556e-05	2.04295e-05	7.93333e-06	7.47064e-06	5.38462e-07	5.38462e-07	3.04065e-05	***
Anaerostignum	3e-06	1.59545e-06	0	0	2.3967e-05	9.53706e-06	0.0108175	*
Pyramidobacter	1.68889e-06	1.38856e-06	6.66667e-06	4.08582e-06	2.04286e-05	9.93629e-06	0.411256
Aeromonas	4.92444e-05	4.73721e-05	0	0	0	0	0.0478822	*
Rhizobiaceae_unclassified	2.89333e-05	2.82594e-05	1.89333e-05	1.89333e-05	0	0	0.153738
Faecalicoccus	4.32222e-05	3.10518e-05	6.22222e-07	6.22222e-07	1.53846e-06	1.14496e-06	0.710596
Allorhizobium-Neorhizobium-Pararhizobium-Rhizobium	4.47333e-05	2.29878e-05	0	0	0	0	2.32456e-08	***
Slackia	1.18444e-05	6.44683e-06	1.97333e-05	1.2785e-05	6.34066e-06	2.79093e-06	0.935716
[Eubacterium]_brachy_group	1.76667e-05	9.73285e-06	1.49556e-05	7.61265e-06	5.35165e-06	1.95738e-06	0.720458
Flavobacteriaceae_uncultured	2.83778e-05	2.83778e-05	0	0	6.76923e-06	3.57334e-06	0.224692
Anaerovoracaceae_unclassified	1.64222e-05	1.14999e-05	2.1e-05	1.91207e-05	2.14286e-06	1.02824e-06	0.969576
Ezakiella	1.09778e-05	7.36848e-06	5.6e-06	3.93269e-06	1.18132e-05	7.53149e-06	0.943098
Eggerthellaceae_uncultured	4.4e-06	3.43326e-06	3.41111e-05	2.82642e-05	0	0	0.0221898	*
Veillonellales-Selenomonadales_unclassified	0	0	1.8e-05	1.43537e-05	9.50549e-06	5.6445e-06	0.238655
Defluviitaleaceae_UCG-011	0	0	8.35556e-06	3.90185e-06	1.38132e-05	4.40676e-06	0.0172613	*
Bacteroidia_unclassified	6.48889e-06	3.9797e-06	5.46667e-06	2.45209e-06	1.18022e-05	4.7588e-06	0.996659
Actinomycetaceae_F0332	3.10889e-05	2.05967e-05	0	0	2.28571e-06	1.0275e-06	4.37319e-05	***
Frisingicoccus	0	0	1.16e-05	7.27993e-06	1.13516e-05	5.0037e-06	0.153828
Lawsonella	2.41111e-05	1.80872e-05	3.42222e-06	2.43325e-06	3.36264e-06	2.95111e-06	0.0291325	*
Rhodococcus	2.72667e-05	1.34872e-05	0	0	2.95604e-06	1.05836e-06	0.00975413	**
Johnsonella	1.76667e-05	9.37717e-06	9.28889e-06	4.12196e-06	2.26374e-06	1.30929e-06	0.13191
Anaeroglobus	2.54222e-05	2.46831e-05	3.91111e-06	2.08017e-06	9.12088e-07	6.41398e-07	0.207176
Hydrogenoanaerobacterium	8.44444e-07	8.44444e-07	7.62222e-06	6.83095e-06	1.05385e-05	5.74822e-06	0.794603
Negativicoccus	8.46667e-06	4.77394e-06	4.62222e-06	3.33504e-06	7.96703e-06	7.34016e-06	0.0316385	*
Erysipelotrichaceae_unclassified	2.4e-05	2.4e-05	0	0	1.04396e-06	7.59621e-07	0.605197
Elizabethkingia	7.24444e-06	4.27243e-06	1.59556e-05	1.03679e-05	5.05495e-07	5.05495e-07	0.00457571	**
Coriobacteriales_uncultured	1.99556e-05	1.5423e-05	0	0	1.96703e-06	1.23724e-06	0.392995
Xanthomonadaceae_unclassified	8.26667e-06	7.51157e-06	1.45556e-05	1.17148e-05	0	0	0.0218525	*
Mogibacterium	2.06889e-05	1.3697e-05	0	0	9.23077e-07	7.07406e-07	3.49859e-05	***
Anaerofustis	7.22222e-06	3.20824e-06	8.66667e-06	4.04932e-06	2.3956e-06	1.46792e-06	0.104261
Acidovorax	1.33111e-05	7.12584e-06	7.08889e-06	7.08889e-06	0	0	0.000152296	***
Parascardovia	1.93333e-05	1.54986e-05	8.44444e-07	8.44444e-07	0	0	0.000649356	***
Elusimicrobium	0	0	1.04e-05	1.04e-05	4.67033e-06	4.67033e-06	0.599718
Aliidiomarina	1.67111e-05	1.15919e-05	0	0	1.18681e-06	1.0913e-06	0.0425365	*
Christensenellaceae_unclassified	0	0	4.51111e-06	4.51111e-06	7.08791e-06	5.97965e-06	0.332805
Eggerthellaceae_CHKCI002	0	0	1.06889e-05	9.38147e-06	3.92308e-06	3.33122e-06	0.355576
Dielma	7.24444e-06	3.87509e-06	5.93333e-06	4.07486e-06	1.93407e-06	9.50394e-07	0.46653
Enterorhabdus	1.18889e-05	5.89275e-06	1.46667e-06	1.46667e-06	1.57143e-06	7.23096e-07	0.076173
Candidatus_Saccharimonas	1.36889e-05	4.29186e-06	1.82222e-06	1.04073e-06	0	0	1.22979e-07	***
Saccharimonadales_unclassified	1.36444e-05	5.88631e-06	7.77778e-07	7.77778e-07	3.07692e-07	3.07692e-07	0.000156056	***
Acetanaerobacterium	3.75556e-06	3.11467e-06	3.02222e-06	1.50067e-06	4.02198e-06	1.2197e-06	0.576348
Caulobacter	1.41778e-05	7.65996e-06	0	0	0	0	0.0004415	***
Bosea	1.37111e-05	7.50297e-06	4.44444e-07	4.44444e-07	0	0	2.6076e-05	***
Campylobacter	2e-06	1.72884e-06	9.11111e-06	8.05174e-06	1.03297e-06	6.07935e-07	0.913356
Sarcina	0	0	0	0	6.2967e-06	5.29216e-06	0.369906
Erysipelatoclostridiaceae_unclassified	1.64444e-06	1.64444e-06	4.15556e-06	2.46838e-06	3.34066e-06	2.13473e-06	0.600224
Oscillospirales_uncultured	0	0	0	0	6.17582e-06	6.17582e-06	0.609872
Firmicutes_Incertae_Sedis_DTU014	9.55556e-07	9.55556e-07	0	0	5.67033e-06	3.72226e-06	0.219795
Cupriavidus	1.23778e-05	7.57396e-06	0	0	0	0	0.0102151	*
Saccharimonadaceae_unclassified	1.02667e-05	6.9124e-06	1.82222e-06	1.82222e-06	1.20879e-07	1.20879e-07	0.013731	*
Jeotgalicoccus	1.21111e-05	1.21111e-05	0	0	0	0	0.220665
Stomatobaculum	4.13333e-06	3.09604e-06	4.75556e-06	3.24864e-06	1.54945e-06	1.15123e-06	0.659629
Brachybacterium	1.19556e-05	1.19556e-05	0	0	0	0	0.220665
Microbacteriaceae_unclassified	1.02222e-05	9.31453e-06	0	0	3.62637e-07	3.62637e-07	0.211711
Dietzia	9.66667e-06	7.52954e-06	0	0	6.15385e-07	5.52665e-07	0.135945
Epulopiscium	9.57778e-06	8.94193e-06	8e-07	8e-07	2.08791e-07	2.08791e-07	0.451432
Chryseobacterium	3.93333e-06	1.99226e-06	6.77778e-06	6.77778e-06	0	0	0.0125113	*
Erysipelotrichaceae_UCG-006	1.06e-05	8.1474e-06	0	0	5.49451e-08	5.49451e-08	0.013686	*
Victivallaceae	0	0	0	0	4.51648e-06	2.47149e-06	0.133823
Coriobacteriales_unclassified	3.15556e-06	2.42898e-06	2.11111e-06	2.11111e-06	1.69231e-06	8.0303e-07	0.704132
Gardnerella	1.08889e-06	1.08889e-06	1.64444e-06	1.64444e-06	2.25275e-06	1.33741e-06	0.728502
Helicobacter	0	0	6.44444e-07	6.44444e-07	2.58242e-06	1.34601e-06	0.323975
Enorma	4.86667e-06	4.86667e-06	0	0	4.72527e-07	4.72527e-07	0.599718
Lactobacillales_unclassified	0	0	0	0	2.25275e-06	1.59804e-06	0.369906
Eggerthellaceae_unclassified	3.11111e-07	3.11111e-07	0	0	1.63736e-06	8.20601e-07	0.212442
Selenomonas	0	0	0	0	1.37363e-06	1.37363e-06	0.609872
Rikenellaceae_unclassified	9.55556e-07	9.55556e-07	0	0	6.15385e-07	4.50415e-07	0.605197
Gammaproteobacteria_unclassified	0	0	0	0	9.67033e-07	9.67033e-07	0.609872
Streptococcaceae_unclassified	0	0	0	0	8.13187e-07	8.13187e-07	0.609872
Brevundimonas	1.51111e-06	8.9647e-07	0	0	0	0	0.0102151	*
Oscillospirales_UCG-011	0	0	0	0	7.36264e-07	7.36264e-07	0.609872
Enterobacterales_unclassified	0	0	1.44444e-06	1.44444e-06	0	0	0.220665
Sanguibacteroides	0	0	0	0	5.82418e-07	5.82418e-07	0.609872
Table S10. The average relative abundance of gut microbiome in UMCD, TMCD, and HC groups at genus level
