# Supplementary material for: Characterization and diagnostic value of the gut microbial composition in patients with minimal change disease
Source: Front Physiol. 2022 Dec 6;13:1070569. doi: 10.3389/fphys.2022.1070569 (PMC9763583; doi:10.3389/fphys.2022.1070569)
Supplement: Supplementary file 1 [file Table2.xlsx]

## Sheet: Sheet1
Group	UMCD	HC	Total	P-value
Population	46	46	92
Gender (Male.1)	25	23	48	0.676
Age	44.5 (22.8, 57)	44 (30.5, 56)	44 (23.3, 56)	0.916
Table S2. Matched gender and age profiles in UMCDs and HCs.
