# Supplementary material for: Characterization and diagnostic value of the gut microbial composition in patients with minimal change disease
Source: Front Physiol. 2022 Dec 6;13:1070569. doi: 10.3389/fphys.2022.1070569 (PMC9763583; doi:10.3389/fphys.2022.1070569)
Supplement: Supplementary file 2 [file Table14.xlsx]

## Sheet: Sheet1
	UMCD	TMCD	HC	p (UMCD vs. HC)	p (TMCD vs. HC)	p (UMCD vs. TMCD)
OTU31 (Lachnospira)	0.000049 (0, 0.000905)	0.000612 (0.000088, 0.002436)	0.005333 (0.00095, 0.015203)	<0.001	<0.001	0.011
OTU52 (Lachnospiraceae_unclassified)	0.000319 (0.000016, 0.00159)	0.000707 (0.000039, 0.002314)	0.004397 (0.0017195, 0.005882)	<0.001	<0.001	0.399
OTU64 (Granulicatella)	0.000065 (0, 0.000178)	0.000023 (0, 0.00005)	0 (0, 0)	<0.001	<0.001	0.006
OTU73 (Lachnospira)	0.00001 (0, 0.000064)	0 (0, 0.000109)	0.001002 (0.0000575, 0.0045415)	<0.001	<0.001	0.997
OTU92 (Streptococcus)	0.000334 (0.000092, 0.001815)	0.000103 (0.000033, 0.000324)	0.000039 (0, 0.0000905)	<0.001	0.001	0.003
OTU108 (Solobacterium)	0.000067 (0, 0.000212)	0.000028 (0, 0.000053)	0 (0, 0)	<0.001	<0.001	0.017
OTU135 (Lachnospiraceae_unclassified)	0.000072 (0, 0.000415)	0.000274 (0.00009, 0.000512)	0.001018 (0.000579, 0.0024345)	<0.001	<0.001	0.026
OTU148 (Pseudomonas)	0.000111 (0, 0.001241)	0.000041 (0, 0.000082)	0 (0, 0)	<0.001	<0.001	0.008
Table S14: The relative abundance of eight obtained OTUs in UMCD, TMCD and HC groups.
