# Supplementary material for: Characterization and diagnostic value of the gut microbial composition in patients with minimal change disease
Source: Front Physiol. 2022 Dec 6;13:1070569. doi: 10.3389/fphys.2022.1070569 (PMC9763583; doi:10.3389/fphys.2022.1070569)
Supplement: Supplementary file 4 [file Table3.xlsx]

## Sheet: phylum.Wilcoxon_rank_sum_unpair
ID	HC.mean	HC.se	UMCD.mean	UMCD.se	p-value	Sig_mark
Firmicutes	0.506422	0.0324742	0.564327	0.0459823	0.25027
Bacteroidota	0.443047	0.0328298	0.190471	0.0327518	2.94574e-06	***
Proteobacteria	0.0368656	0.0117277	0.186071	0.0443463	0.00395162	**
Actinobacteriota	0.00869332	0.00300375	0.0471185	0.00993546	0.000547578	***
Desulfobacterota	0.00230487	0.000491013	0.00279013	0.00183161	0.00132465	**
Verrucomicrobiota	0.00208529	0.00196631	0.00294745	0.00286909	0.19918
Fusobacteriota	4.37742e-05	1.67358e-05	0.00422265	0.00295203	0.0214962	*
Patescibacteria	5.86452e-05	2.34985e-05	0.00184723	0.00104527	3.274e-07	***
Bacteria_unclassified	0.000260516	0.000134038	0.000116323	6.20035e-05	0.240058
Cyanobacteria	0.000109968	8.25322e-05	8.61935e-05	4.57441e-05	0.0396325	*
Synergistota	0.00010871	6.79571e-05	3.29032e-06	2.70173e-06	0.0303501	*
Table S3. The average relative abundance of gut microbiome in HC and UMCD groups at phylum level
