# Supplementary material for: Characterization and diagnostic value of the gut microbial composition in patients with minimal change disease
Source: Front Physiol. 2022 Dec 6;13:1070569. doi: 10.3389/fphys.2022.1070569 (PMC9763583; doi:10.3389/fphys.2022.1070569)
Supplement: Supplementary file 5 [file Table9.xlsx]

## Sheet: Sheet1
OTU ID	HC	JN_MCD	p
OTU31 (Lachnospira)	0.0089316	0.000347	0.035
OTU52 (Lachnospiraceae_unclassified)	0.00492	0.0001513	<0.001
OTU64 (Granulicatella)	2.35e-05	0.000159	0.165
OTU73 (Lachnospira)	0.00757	2.56e-05	0.035
OTU92 (Streptococcus)	7.42e-05	0.00566	0.089
OTU108 (Solobacterium)	5.4e-06	0.00124	0.035
OTU135 (Lachnospiraceae_unclassified)	0.0025318	0.0001227	0.019
OTU148 (Pseudomonas)	0	0.00134	0.002
Table S9: The relative abundance of eight obtained OTUs in JN_MCD and HC cohort.
