# Supplementary material for: Characterization and diagnostic value of the gut microbial composition in patients with minimal change disease
Source: Front Physiol. 2022 Dec 6;13:1070569. doi: 10.3389/fphys.2022.1070569 (PMC9763583; doi:10.3389/fphys.2022.1070569)
Supplement: Supplementary file 12 [file Table15.xlsx]

## Sheet: phylum.Kruskal-Wallis_rank_sum.
ID	UMCD.mean	UMCD.se	TMCD.mean	TMCD.se	HC.mean	HC.se	p-value	Sig_mark
Firmicutes	0.56565	0.0367086	0.528035	0.0404907	0.522553	0.0198238	0.345184
Bacteroidota	0.200725	0.0289006	0.286306	0.0320171	0.415926	0.0202113	1.85676e-08	***
Proteobacteria	0.174448	0.0379146	0.163039	0.0380361	0.042389	0.00875949	0.000808299	***
Actinobacteriota	0.0474387	0.00870909	0.018715	0.00410289	0.0142802	0.00268216	0.000224246	***
Desulfobacterota	0.00238627	0.00127928	0.0020836	0.000624913	0.00239019	0.000330405	0.0202496	*
Verrucomicrobiota	0.00427002	0.00244207	0.000991378	0.000554179	0.000930132	0.000670104	0.819244
Fusobacteriota	0.00295056	0.00208323	0.000272156	7.79505e-05	0.000545604	0.000245153	0.419776
Bacteria_unclassified	0.000150933	3.34895e-05	0.000259911	4.12067e-05	0.000752637	9.19774e-05	5.73706e-08	***
Patescibacteria	0.00156598	0.00072214	0.000198156	4.95818e-05	4.85385e-05	9.68346e-06	1.34556e-11	***
Cyanobacteria	0.000356978	0.00024079	6.53778e-05	3.81517e-05	0.000118484	6.26492e-05	0.000150206	***
Synergistota	5.52222e-05	4.87769e-05	1.50444e-05	6.7143e-06	5.79231e-05	2.42881e-05	0.118961
Elusimicrobiota	0	0	1.04e-05	1.04e-05	4.67033e-06	4.67033e-06	0.599718
Campilobacterota	2e-06	1.72884e-06	9.75556e-06	8.06095e-06	3.61538e-06	1.45672e-06	0.772034
Table S15. The average relative abundance of gut microbiome in UMCD, TMCD, and HC groups at phylum level
