# Supplementary material for: Characterization and diagnostic value of the gut microbial composition in patients with minimal change disease
Source: Front Physiol. 2022 Dec 6;13:1070569. doi: 10.3389/fphys.2022.1070569 (PMC9763583; doi:10.3389/fphys.2022.1070569)
Supplement: Supplementary file 13 [file Table6.xlsx]

## Sheet: Table S3
OTU	HC-median	HC-mean	HC-se	UMCD-median	UMCD-mean	UMCD-se	we.ep	we.eBH	wi.ep	wi.eBH	rab.all	rab.win.HC	rab.win.UMCD	diff.btw	diff.win	effect	effect.low	effect.high	overlap	we.Sig_mark	wi.Sig_mark
OTU52 (Lachnospiraceae_unclassified)	4153(2216.5,5497)	6211.29	1777.41	301(<0.0001,1175)	784.129	236.136	1.13e-05	0.000817	3.42e-07	4.02e-05	10.6446	11.7178	8.2851	-3.66851	5.15701	-0.717303	-11.609	0.815093	0.1446	***	***
OTU73 (Lachnospira)	1700(388.5,5801)	4665.71	1239.01	<0.0001(<0.0001,29.5)	22.5806	8.72443	3.64e-06	0.000245	9e-07	8.16e-05	5.28839	10.4897	0.488732	-8.34002	7.43559	-1.02691	-10.1057	1.91615	0.141372	***	***
OTU148 (Pseudomonas)	<0.0001(<0.0001,<0.0001)	0	0	147(36.5,1292)	2017.81	799.18	7.04e-09	2.11e-06	5.08e-08	6.38e-06	0.0317804	-2.19398	8.03189	10.7337	6.27643	1.5013	-0.881543	11.4792	0.0974	***	***
OTU31 (Lachnospira)	5539(1461,15615.5)	13944.3	4146.82	14(<0.0001,375)	965.194	611.797	6.28e-08	1.7e-05	7.52e-09	2.38e-06	9.69612	11.8478	3.95324	-7.74574	6.91949	-1.09293	-10.5539	0.596315	0.105779	***	***
OTU135 (Lachnospiraceae_unclassified)	2215(1000,3804)	3022.23	567.31	65(<0.0001,266.5)	529.871	201.903	3.81e-06	0.000335	3.22e-07	3.84e-05	9.59677	11.0895	6.49943	-4.86416	6.28451	-0.851272	-10.7859	1.16887	0.15017	***	***
OTU108 (Solobacterium)	<0.0001(<0.0001,5)	7.41935	2.75945	94(25,226)	1393.52	1208.05	1.15e-05	0.000469	1.35e-06	0.000109	3.87033	-1.2026	7.51133	7.51064	7.06268	0.978074	-1.55023	9.20088	0.141372	***	***
OTU64 (Granulicatella)	<0.0001(<0.0001,8)	10.8065	4.5958	89(13.5,207.5)	2755.16	2597.92	4.58e-05	0.00159515	1.52e-05	0.000781	3.04009	-1.28883	6.73514	7.16497	7.45463	0.867342	-1.65551	8.82059	0.178564	***	***
OTU92 (Streptococcus)	46(<0.0001,130)	130.903	41.0118	415(148,2688.5)	6174.61	2667.28	3.03e-07	4.82e-05	4.09e-09	1.81e-06	7.15405	5.31371	9.82411	5.40429	6.10339	0.919519	-0.552904	10.0308	0.099	***	***
Table S6. Validation on the obtained key OTUs using ALDEx2. we.ep, a vector containing the expected p-value of Welch’s t-test for each feature; we.eBH a vector containing the corresponding expected value of the Benjamini-Hochberg corrected p-value for each feature; wi.ep a vector containing the expected p-value of the Wilcoxon Rank Sum test for each feature; wi.eBH a vector containing the corresp…
