# Supplementary material for: Characterization and diagnostic value of the gut microbial composition in patients with minimal change disease
Source: Front Physiol. 2022 Dec 6;13:1070569. doi: 10.3389/fphys.2022.1070569 (PMC9763583; doi:10.3389/fphys.2022.1070569)
Supplement: Supplementary file 14 [file Table11.xlsx]

## Sheet: Sheet1
OTU ID	HC	RE_MCD	p
OTU31 (Lachnospira)	0.301398	0.000561	0.13
OTU52 (Lachnospiraceae_unclassified)	0.00537725	0.00203362	0.279
OTU64 (Granulicatella)	1.5875e-05	4.86e-05	0.161
OTU73 (Lachnospira)	0.0249748	0.000512125	0.959
OTU92 (Streptococcus)	9.26e-05	0.000481	0.645
OTU108 (Solobacterium)	1.525e-05	8.64e-05	0.279
OTU135 (Lachnospiraceae_unclassified)	0.000758	0.00139	0.574
OTU148 (Pseudomonas)	0	0.000214	0.01
Table S11: The relative abundance of eight obtained OTUs in Re_MCD and HC cohort.
