# Supplementary material for: Characterization and diagnostic value of the gut microbial composition in patients with minimal change disease
Source: Front Physiol. 2022 Dec 6;13:1070569. doi: 10.3389/fphys.2022.1070569 (PMC9763583; doi:10.3389/fphys.2022.1070569)
Supplement: Supplementary file 15 [file Table4.xlsx]

## Sheet: genus.Wilcoxon_rank_sum_unpaire
ID	HC.mean	HC.se	UMCD.mean	UMCD.se	p-value	Sig_mark
Bacteroides	0.237256	0.0281133	0.146298	0.0323857	0.00572492	**
Faecalibacterium	0.10588	0.0178042	0.0834325	0.0222711	0.0435285	*
Prevotella	0.149954	0.0427916	0.0212237	0.00931455	0.91023
Escherichia-Shigella	0.0228138	0.0120088	0.132789	0.0415925	0.0105698	*
Megamonas	0.0510693	0.0249609	0.030739	0.0214854	0.662272
Subdoligranulum	0.0196639	0.00440007	0.0509491	0.0105567	0.139321
Blautia	0.0353224	0.00579006	0.0324113	0.00858257	0.266043
Lachnospiraceae_unclassified	0.0333478	0.0038154	0.014685	0.00376554	1.51702e-05	***
Bifidobacterium	0.00721148	0.0025553	0.036918	0.00913899	0.0114997	*
Agathobacter	0.0253156	0.00431595	0.0123564	0.00316229	0.00603879	**
Enterococcus	1.86129e-05	7.17533e-06	0.030527	0.0137872	0.00160065	**
Enterobacteriaceae_unclassified	0.00288368	0.00171967	0.0270639	0.0159688	0.0881363
Alistipes	0.016515	0.00352722	0.00650019	0.00269708	0.0166662	*
[Ruminococcus]_torques_group	0.00695171	0.00347534	0.0158152	0.00548586	0.498883
[Eubacterium]_hallii_group	0.00511261	0.00120104	0.0169854	0.0052748	0.713919
Fusicatenibacter	0.0156229	0.00438748	0.00514481	0.00163523	0.0250349	*
Lachnospira	0.0186454	0.0046224	0.000987774	0.000611761	1.7513e-09	***
Oscillospiraceae_UCG-002	0.0151173	0.00496569	0.00439552	0.00150817	0.0954533
Erysipelotrichaceae_UCG-003	0.00215945	0.000372949	0.0170207	0.0131364	0.93258
Parabacteroides	0.00914332	0.00190286	0.00985852	0.00409868	0.0871608
Lachnoclostridium	0.0152227	0.00621029	0.00332219	0.000764405	0.000225521	***
Streptococcus	0.00109265	0.000288988	0.0167957	0.00468668	6.9703e-05	***
Dorea	0.00299119	0.000377661	0.014627	0.00435645	0.0592109
Dialister	0.0143544	0.0043109	0.00282087	0.00214467	0.0174733	*
Roseburia	0.00933526	0.00197794	0.00773403	0.00261864	0.0091682	**
Clostridiaceae_Clostridium_sensu_stricto	0.000998355	0.000256856	0.0156502	0.0121889	0.14286
[Eubacterium]_eligens_group	0.0139229	0.00388472	0.00170835	0.0008068	0.000102322	***
[Ruminococcus]_gnavus_group	0.00182516	0.00123599	0.0137665	0.00848787	0.260832
Ruminococcaceae_unclassified	0.00496613	0.00110545	0.0103419	0.00382757	0.171166
Phascolarctobacterium	0.0108473	0.00263624	0.00416748	0.00209535	0.00770081	**
[Eubacterium]_coprostanoligenes_group	0.00758448	0.00240835	0.00726568	0.00416799	0.295746
Alloprevotella	0.0127645	0.0105482	0.00118126	0.000933852	0.252954
Romboutsia	0.00254813	0.000732528	0.0110744	0.00404179	0.94946
Weissella	9.51613e-06	4.02489e-06	0.0132505	0.0088343	0.000450471	***
Holdemanella	0.000386774	0.000185415	0.0125259	0.00743554	0.198546
Pediococcus	0	0	0.0128942	0.0128929	0.160688
Anaerostipes	0.00506452	0.00110092	0.00728494	0.00306538	0.0466774	*
Veillonella	0.000486097	0.000232349	0.0107357	0.00448051	0.0117328	*
Aerococcus	0	0	0.00982839	0.00982685	0.160688
Ruminococcus	0.00719468	0.00274083	0.0019699	0.000996296	0.00558099	**
Haemophilus	0.000468548	0.000168256	0.00801665	0.00436194	0.472765
Parasutterella	0.00536006	0.00132896	0.0029641	0.00125095	0.0302678	*
Lactobacillus	0.00176971	0.0015168	0.00620465	0.00366899	0.00890217	**
Intestinibacter	0.000827194	0.000318074	0.00704865	0.00544026	0.96607
Lachnospiraceae_NK4A136_group	0.00491435	0.00108495	0.00293671	0.000859924	0.0396213	*
Ruminococcaceae_CAG-352	0.000775774	0.00029032	0.00591152	0.00344842	0.75973
Coprococcus	0.00567745	0.00181613	0.000906548	0.000363376	0.00612279	**
Prevotellaceae_NK3B31_group	0.00586687	0.0053453	0	0	0.0420406	*
Christensenellaceae_R-7_group	0.00480113	0.00326387	0.000856613	0.000278353	0.22625
[Eubacterium]_ruminantium_group	0.00534181	0.00409911	8.29677e-05	6.34228e-05	0.501232
Psychrobacter	0	0	0.0054109	0.00540407	0.0420406	*
Muribaculaceae	0.00145658	0.00100927	0.00391542	0.00311263	0.189613
Sutterella	0.00481523	0.00106371	0.000452935	0.000229292	1.89308e-05	***
Erysipelatoclostridium	2.08065e-05	8.52011e-06	0.00501506	0.00277539	4.67596e-05	***
Akkermansia	0.00204706	0.00194746	0.00294745	0.00286909	0.805788
Collinsella	0.00110555	0.000470938	0.00365271	0.00116378	0.77602
Clostridia_UCG-014	0.0046761	0.0023756	4.75806e-05	2.77723e-05	0.157043
Megasphaera	0.00374232	0.00302636	0.000854097	0.000625973	0.8075
Lachnospiraceae_ND3007_group	0.00409781	0.00102543	0.000450806	0.000226589	0.000299629	***
Stenotrophomonas	0	0	0.00440126	0.00221636	5.90009e-06	***
Fusobacterium	4.37742e-05	1.67358e-05	0.00414303	0.00295471	0.0330801	*
Oscillospiraceae_UCG-005	0.00370735	0.00160515	0.000461581	0.000151093	0.0143421	*
Oscillospiraceae_NK4A214_group	0.00374616	0.00115394	0.000165129	8.90277e-05	0.00567889	**
Monoglobus	0.00145355	0.000294585	0.00230623	0.000659164	0.372906
[Ruminococcus]_gauvreauii_group	0.000947129	0.000195468	0.00280226	0.00216848	0.22928
Clostridiaceae_unclassified	2.4e-05	1.50031e-05	0.00370784	0.00331157	0.0448348	*
Flavonifractor	0.000773387	0.00018792	0.00286603	0.00176431	0.355445
Barnesiella	0.00323887	0.000983811	0.000242065	0.000134033	0.00388606	**
Butyricicoccus	0.00178503	0.000226236	0.00148474	0.000384139	0.020858	*
Oscillospiraceae_UCG-003	0.00243371	0.000514488	0.000787484	0.00036322	0.000268367	***
Peptostreptococcus	2.67742e-06	2.15695e-06	0.00307455	0.00305699	0.00496619	**
Tyzzerella	0.00103232	0.000400228	0.00199261	0.00160684	0.00181125	**
Clostridia_unclassified	0.00188465	0.000376661	0.00101806	0.000456264	0.00109426	**
Desulfovibrio	0.000647548	0.000270757	0.00217516	0.00163706	0.0170295	*
Granulicatella	1.08065e-05	4.5958e-06	0.00275516	0.00259792	4.58807e-06	***
Actinomyces	7.03548e-05	2.53942e-05	0.00255697	0.00217595	5.65575e-05	***
Oscillibacter	0.00183119	0.00070828	0.000722419	0.000349604	0.000946747	***
Bilophila	0.00165732	0.000345066	0.000614968	0.000234025	0.00337759	**
[Eubacterium]_ventriosum_group	0.0020279	0.000604679	0.000185419	8.85826e-05	6.64467e-05	***
Pseudomonas	1.09677e-06	1.09677e-06	0.00202435	0.000802322	5.53777e-09	***
Ruminococcaceae_uncultured	0.00159855	0.000788065	0.000419161	0.000168541	0.00543764	**
Paraprevotella	0.00176045	0.000649849	0.000198484	0.000100453	0.125438
Negativibacillus	0.000228516	0.000158833	0.00167694	0.00167224	0.0926513
Lachnospiraceae_UCG-010	0.00102126	0.000287544	0.00083329	0.000479179	0.00535378	**
Coprobacter	0.00147397	0.000627389	1.04839e-05	6.0661e-06	0.00046194	***
Ruminococcaceae_UBA1819	0.000467129	0.000251246	0.000991065	0.000527792	0.508901
Lachnospiraceae_NC2004_group	0.00122	0.000381	0.000187065	6.16799e-05	0.000886316	***
Solobacterium	7.41935e-06	2.75945e-06	0.00139352	0.00120805	9.05313e-07	***
Ruminococcaceae_Incertae_Sedis	0.00093529	0.000227549	0.000393903	0.000131969	0.00633912	**
Catenibacterium	0.000843806	0.000828475	0.000475839	0.000345633	0.089056
Odoribacter	0.000954871	0.000242253	0.000348677	0.000156692	0.0069592	**
Lachnospiraceae_UCG-001	0.00112465	0.000362124	7.46129e-05	2.52519e-05	0.000608639	***
Turicibacter	0.000205	0.000102755	0.000888935	0.00033749	0.736536
Butyricimonas	0.000828645	0.000214162	0.000218516	7.70192e-05	0.00547349	**
Sphingomonas	0.000244935	9.29651e-05	0.000794613	0.00076424	0.0140403	*
Eggerthella	3.15161e-05	1.12973e-05	0.000996129	0.00034763	0.0137663	*
[Eubacterium]_xylanophilum_group	0.00100923	0.000539188	1.12903e-06	7.88004e-07	0.000605311	***
Lactococcus	8.29032e-06	4.04841e-06	0.000911968	0.000834405	0.703548
Oscillospiraceae_unclassified	0.000529645	0.00018481	0.000389968	0.000167033	0.0185226	*
Colidextribacter	0.000790452	0.000187726	0.000117097	8.51854e-05	7.79743e-07	***
Saccharimonadaceae	1.00645e-05	5.39652e-06	0.00089171	0.000700113	0.000686547	***
Anaerovoracaceae_Family_XIII_AD3011_group	0.000102548	2.74305e-05	0.000738516	0.000252969	0.0336323	*
Terrisporobacter	0.000255	9.59751e-05	0.000578097	0.000345714	0.433868
Atopobium	8.35484e-06	3.32069e-06	0.000787032	0.000740602	0.0445253	*
Peptostreptococcaceae_unclassified	2.06129e-05	7.38229e-06	0.000751065	0.000712513	0.558076
Hungatella	0.000356613	0.000121101	0.000388419	0.000211471	0.0007142	***
Oribacterium	7.25806e-06	3.41942e-06	0.000711387	0.000641307	0.00268389	**
Tannerellaceae_unclassified	0.000431968	0.000268592	0.000233742	0.000158371	0.368403
Lachnospiraceae_UCG-004	0.000576742	0.000140165	7.95161e-05	2.47036e-05	0.000264879	***
Bacilli_unclassified	0.000122935	0.000117015	0.000529194	0.000476388	0.320408
Saccharimonadaceae_TM7x	3.92258e-05	1.67832e-05	0.000606	0.000178305	3.64437e-06	***
[Clostridium]_innocuum_group	7.8871e-05	6.0836e-05	0.000525484	0.000327067	0.00474499	**
Oscillospiraceae_uncultured	0.000266323	6.65347e-05	0.000309452	0.000152165	0.0617561
Lachnospiraceae_FCS020_group	0.000307387	6.09406e-05	0.000251581	9.28124e-05	0.054692
Oscillospirales_UCG-010	0.000504516	0.00032624	2.48387e-05	1.13249e-05	0.0978139
Prevotellaceae_UCG-001	0.000523742	0.00052261	0	0	0.160688
Halomonas	0	0	0.000484258	0.000396736	0.00565737	**
Prevotellaceae_Ga6A1_group	0.000467548	0.000465619	9.80645e-06	7.61188e-06	1
Abiotrophia	8.06452e-07	8.06452e-07	0.000464581	0.000424202	0.00250167	**
Bacilli_RF39	0.000310806	0.000149445	0.000110452	8.30184e-05	0.0377795	*
Senegalimassilia	3.9871e-05	1.623e-05	0.000354839	0.000186837	0.156776
Eisenbergiella	9.29032e-06	4.50572e-06	0.000383581	0.00031843	0.0402605	*
Bacteria_unclassified	0.000260516	0.000134038	0.000116323	6.20035e-05	0.240058
Bacteroidales_unclassified	0.000339355	0.000113156	3.55806e-05	1.24136e-05	6.79246e-06	***
[Eubacterium]_siraeum_group	0.000328226	0.000242874	3.09032e-05	1.81731e-05	0.899063
Alloscardovia	0	0	0.000341839	0.000305452	0.08158
Olsenella	2.80645e-06	1.44759e-06	0.000338419	0.000330932	0.236458
Saccharimonadales	8.67742e-06	3.20631e-06	0.000321516	0.000287704	0.0640503
Scardovia	1.45161e-06	1.02216e-06	0.000312226	0.000287591	0.0133805	*
Proteus	6.12903e-07	4.7446e-07	0.000308484	0.000308484	0.596078
Lachnospiraceae_UCG-008	0.000290968	7.9123e-05	8.54839e-06	4.134e-06	2.67032e-06	***
Gemella	9.45161e-06	3.90226e-06	0.000283548	0.000123511	6.11828e-06	***
Adlercreutzia	0.000122065	3.37246e-05	0.00011229	4.68323e-05	0.125712
Rothia	4.25806e-05	1.71697e-05	0.000188452	7.3233e-05	0.00932548	**
Lachnospiraceae_GCA-900066575	0.000188516	7.51066e-05	3.61935e-05	1.79401e-05	0.000764735	***
Butyricicoccaceae_UCG-009	0.000189226	0.000116077	3.03871e-05	1.80706e-05	0.031934	*
Holdemania	9.23871e-05	2.49306e-05	0.000118516	6.0405e-05	0.295595
Rhodospirillales_uncultured	0.000205452	9.78643e-05	0	0	0.00283858	**
Fournierella	3.36452e-05	2.37394e-05	0.000168871	0.00014708	0.311994
Aggregatibacter	0	0	0.000190935	0.000156974	0.0111329	*
Sphingobacterium	0	0	0.000184806	0.000183942	0.160688
Allisonella	0.000140452	5.6044e-05	3.18065e-05	2.19936e-05	0.15595
Phocea	3.95161e-05	1.32094e-05	0.000117548	0.000103393	0.0287292	*
Achromobacter	6.45161e-08	6.45161e-08	0.000146839	8.69372e-05	0.00489233	**
Anaerovoracaceae_Family_XIII_UCG-001	0.000124484	4.15027e-05	1.07742e-05	5.60083e-06	0.00226978	**
Howardella	3.23871e-05	2.00138e-05	0.000101387	6.03244e-05	0.626408
Coriobacteriales_Incertae_Sedis_uncultured	3.2129e-05	1.08703e-05	9.82258e-05	4.57651e-05	0.843417
Methylobacterium-Methylorubrum	9.03226e-07	9.03226e-07	0.000127	6.82727e-05	0.0216803	*
Pelomonas	0	0	0.000113226	6.34326e-05	0.00283858	**
Paenochrobactrum	0	0	0.000109903	0.000109903	0.333173
Alcaligenes	0	0	0.000108516	6.76442e-05	0.00283858	**
Gastranaerophilales	0.000106581	8.13873e-05	0	0	0.160688
Anaerotruncus	9.1e-05	3.40656e-05	1.55161e-05	1.06444e-05	0.000365689	***
Gordonibacter	5.35484e-06	2.62435e-06	9.79032e-05	4.29056e-05	0.0138271	*
Faecalitalea	2.37742e-05	1.59822e-05	7.85806e-05	7.70943e-05	0.418184
Lachnoanaerobaculum	7.06452e-06	5.20276e-06	9.34516e-05	7.36735e-05	0.0603529
Xanthobacteraceae_unclassified	0	0	9.85161e-05	5.29175e-05	0.000682203	***
Kocuria	0	0	9.78065e-05	9.20183e-05	0.08158
Cloacibacillus	8.85806e-05	5.75253e-05	2.64516e-06	2.64516e-06	0.0838228
Chloroplast	3.3871e-06	3.25632e-06	8.61935e-05	4.57441e-05	0.0092407	**
Christensenellaceae_uncultured	8.58387e-05	3.70918e-05	2.74194e-06	2.74194e-06	0.000770587	***
Moryella	4.67742e-05	1.20306e-05	4.17419e-05	2.49072e-05	0.0244141	*
Eubacterium	2.93548e-06	2.93548e-06	7.93871e-05	7.93871e-05	1
Leptotrichia	0	0	7.96129e-05	7.57595e-05	0.08158
Raoultibacter	3.35484e-06	1.91741e-06	6.83226e-05	2.61908e-05	0.0071012	**
Peptoniphilus	3.51613e-06	2.92151e-06	6.76129e-05	4.969e-05	0.124872
Oxalobacter	6.95161e-05	2.81293e-05	1.41935e-06	1.41935e-06	0.00268214	**
Serratia	1.03226e-06	1.03226e-06	6.95161e-05	4.50699e-05	0.0216803	*
Ruminococcaceae_DTU089	2.90968e-05	1.39586e-05	4.10645e-05	4.10645e-05	0.0314828	*
Pelagibacterium	0	0	6.8129e-05	6.8129e-05	0.333173
Oscillospirales_unclassified	4.86452e-05	3.46181e-05	1.51613e-05	1.02185e-05	0.751158
[Eubacterium]_nodatum_group	3.90323e-06	2.2372e-06	5.9129e-05	4.13063e-05	0.0569471
Acinetobacter	0	0	6.21935e-05	2.92238e-05	0.00283858	**
Allorhizobium-Neorhizobium-Pararhizobium-Rhizobium	0	0	6.20323e-05	3.2402e-05	0.00283858	**
Intestinimonas	5.23548e-05	3.17214e-05	7.96774e-06	7.96774e-06	0.0941234
Vagococcus	0	0	5.82258e-05	3.28025e-05	0.0420406	*
Sellimonas	5.63871e-05	3.38084e-05	0	0	0.00565737	**
Corynebacterium	1.25806e-06	1.25806e-06	5.13226e-05	3.2846e-05	0.0139447	*
Pseudochrobactrum	0	0	5.25806e-05	5.25806e-05	0.333173
Prevotellaceae_unclassified	4.80645e-05	4.6944e-05	0	0	0.160688
Rhodococcus	4.90323e-06	2.40267e-06	3.87097e-05	1.90593e-05	0.150083
Rhizobiaceae_unclassified	0	0	4.16129e-05	4.06244e-05	0.160688
Coprobacillus	1.0129e-05	4.06499e-06	2.88065e-05	2.34832e-05	0.374587
Victivallis	3.82258e-05	2.18036e-05	0	0	0.0111329	*
Erysipelotrichaceae_unclassified	0	0	3.70645e-05	3.70645e-05	0.333173
Anaeroglobus	1.32258e-06	1.32258e-06	3.39032e-05	3.39032e-05	1
Parvimonas	0	0	3.46452e-05	1.31607e-05	0.00283858	**
Actinomycetaceae_F0332	1.58065e-06	1.33905e-06	3.12903e-05	2.32542e-05	0.0357639	*
Fenollaria	6.6129e-06	3.15638e-06	2.42903e-05	1.51924e-05	0.474908
Leuconostoc	6.83871e-06	3.1343e-06	2.33548e-05	1.3299e-05	0.214864
Candidatus_Soleaferrea	1.62903e-05	8.79421e-06	1.33226e-05	5.85091e-06	0.807907
Johnsonella	2.93548e-06	2.93548e-06	2.4871e-05	1.22766e-05	0.0261875	*
[Eubacterium]_oxidoreducens_group	2.32258e-05	1.64808e-05	4.45161e-06	2.91781e-06	0.411249
Catabacter	7.67742e-06	2.83806e-06	1.99677e-05	1.383e-05	0.46577
Peptococcus	2.48065e-05	1.63015e-05	2.70968e-06	2.70968e-06	0.305446
Parascardovia	0	0	2.64194e-05	2.3414e-05	0.0420406	*
Faecalicoccus	2.06452e-06	2.06452e-06	2.24516e-05	2.24516e-05	1
Aliidiomarina	2.25806e-07	2.25806e-07	2.32903e-05	1.79655e-05	0.290109
Caulobacter	0	0	2.16129e-05	1.12021e-05	0.0216944	*
Anaerofilum	1.98387e-05	1.17532e-05	1.25806e-06	1.25806e-06	0.290109
Acidovorax	4.83871e-07	4.83871e-07	2.03226e-05	9.97894e-06	0.0216803	*
Pyramidobacter	2.0129e-05	1.25605e-05	6.45161e-07	6.45161e-07	0.15241
Bosea	0	0	2.07419e-05	1.13115e-05	0.00283858	**
Mogibacterium	0	0	2.00968e-05	1.89951e-05	0.160688
Cupriavidus	0	0	1.87419e-05	1.09162e-05	0.0420406	*
Hydrogenoanaerobacterium	1.87419e-05	1.30792e-05	0	0	0.160688
Jeotgalicoccus	0	0	1.74516e-05	1.74516e-05	0.333173
Clostridia_vadinBB60_group	1.6e-05	1.6e-05	0	0	0.333173
Brachybacterium	0	0	1.57742e-05	1.57742e-05	0.333173
Negativicoccus	1.93548e-06	1.93548e-06	1.36452e-05	7.80206e-06	0.0888529
Flavobacteriaceae_uncultured	1.55484e-05	1.01746e-05	0	0	0.08158
Peptococcaceae_uncultured	1.54839e-05	1.54839e-05	0	0	0.333173
Veillonellales-Selenomonadales_unclassified	1.53226e-05	1.1665e-05	0	0	0.160688
Saccharimonadales_unclassified	6.77419e-07	6.77419e-07	1.45806e-05	7.84401e-06	0.0429687	*
Dietzia	1.93548e-07	1.93548e-07	1.48065e-05	1.15614e-05	0.544667
Erysipelotrichaceae_UCG-006	1.29032e-07	1.29032e-07	1.45806e-05	1.27285e-05	0.544667
Frisingicoccus	1.46129e-05	8.26714e-06	0	0	0.08158
Saccharimonadaceae_unclassified	0	0	1.34194e-05	9.37989e-06	0.0420406	*
[Clostridium]_methylpentosum_group	1.11613e-05	8.28473e-06	1.93548e-06	1.93548e-06	0.321312
Slackia	3.67742e-06	2.67541e-06	8.45161e-06	5.91678e-06	0.960451
Firmicutes_unclassified	1.18387e-05	7.3905e-06	0	0	0.0420406	*
Ezakiella	1.22581e-06	8.57239e-07	1.05806e-05	9.19581e-06	0.960451
Anaerococcus	4.51613e-07	4.51613e-07	1.11613e-05	8.07107e-06	0.15241
Porphyromonas	7.32258e-06	3.59432e-06	2.58065e-06	1.55596e-06	0.411249
Finegoldia	1.16129e-06	1.16129e-06	8e-06	6.15988e-06	0.305446
Elizabethkingia	0	0	8.80645e-06	4.68271e-06	0.0216944	*
Enorma	0	0	7.77419e-06	7.77419e-06	0.333173
Gardnerella	4.83871e-06	3.88714e-06	2.80645e-06	1.95455e-06	1
Brevundimonas	0	0	2.58065e-06	1.46997e-06	0.08158
Lachnospirales_unclassified	1.41935e-06	1.41935e-06	0	0	0.333173
Table S4. The average relative abundance of gut microbiome in HC and UMCD groups at genes level
