# Supplementary material for: Characterization and diagnostic value of the gut microbial composition in patients with minimal change disease
Source: Front Physiol. 2022 Dec 6;13:1070569. doi: 10.3389/fphys.2022.1070569 (PMC9763583; doi:10.3389/fphys.2022.1070569)
Supplement: Supplementary file 16 [file Table1.xlsx]

## Sheet: Sheet3
Group	MCD	HC	Total	P-value
Population	110	111	221
Gender (Male.1)	71	62	133	0.218
Age	32 (20, 54)	42 (37, 54)	39 (31, 54)	0.326
ALB	23.7 (17.55, 35.65)	48 (45.98, 49.73)	41.1 (19.8, 47.9)	0.008
24h_Pro	4.85 (0.79, 8.45)
Scr	72 (60, 88)	66.5 (52.5, 77.25)	72 (57, 81)	<0.001
Table S1. Baseline characteristics of patiens with MCD and HCs. MCD, minimal change disease; HC, healthy control; ALB, albumin; 24h_Pro, 24h urine protein; SCr, serum creatinine.
