# Supplementary material for: Characterization and diagnostic value of the gut microbial composition in patients with minimal change disease
Source: Front Physiol. 2022 Dec 6;13:1070569. doi: 10.3389/fphys.2022.1070569 (PMC9763583; doi:10.3389/fphys.2022.1070569)
Supplement: Supplementary file 17 [file Table10.xlsx]

## Sheet: Sheet1
Group	Re_MCD	HC	Total	P-value
Population	8	8	16
Gender (Male.1)	6	3	9	0.157
Age	41.2±18.1	38.5±10	41.2±14.6	0.645
Table S10. Matched gender and age profiles in Re_MCDs and HCs.
