# Supplementary material for: Characterization and diagnostic value of the gut microbial composition in patients with minimal change disease
Source: Front Physiol. 2022 Dec 6;13:1070569. doi: 10.3389/fphys.2022.1070569 (PMC9763583; doi:10.3389/fphys.2022.1070569)
Supplement: Supplementary file 18 [file Table12.xlsx]

## Sheet: Sheet1
Group	TMCD	HC	Total	P-value
Population	45	45	90
Gender (Male.1)	34	32	66	0.634
Age	22 (19.5, 45.5)	36 (26.5 42)	34 (19.8, 44)	0.056
Table S12. Matched gender and age profiles in TMCDs and HCs.
