# Supplementary material for: Characterization and diagnostic value of the gut microbial composition in patients with minimal change disease
Source: Front Physiol. 2022 Dec 6;13:1070569. doi: 10.3389/fphys.2022.1070569 (PMC9763583; doi:10.3389/fphys.2022.1070569)
Supplement: Supplementary file 19 [file Table5.xlsx]

## Sheet: Sheet1
OTU ID	HC_discovery	UMCD_discovery	p
OTU31 (Lachnospira)	0.0139443	0.000965194	2.83859e-08
OTU52 (Lachnospiraceae_unclassified)	0.00621129	0.000784129	4.48113e-08
OTU64 (Granulicatella)	1.08065e-05	0.00275516	4.58807e-06
OTU73 (Lachnospira)	0.00466571	2.25806e-05	3.06093e-07
OTU92 (Streptococcus)	0.000130903	0.00617461	1.09136e-06
OTU108 (Solobacterium)	7.41935e-06	0.00139352	9.05313e-07
OTU135 (Lachnospiraceae_unclassified)	0.00302223	0.000529871	2.10731e-07
OTU148 (Pseudomonas)	0	0.00201781	2.50871e-09
Table S5: The relative abundance of eight obtained OTUs in UMCD and HC groups in discovery cohort.
