# Supplementary material for: Characterization and diagnostic value of the gut microbial composition in patients with minimal change disease
Source: Front Physiol. 2022 Dec 6;13:1070569. doi: 10.3389/fphys.2022.1070569 (PMC9763583; doi:10.3389/fphys.2022.1070569)
Supplement: Supplementary file 20 [file Table13.xlsx]

## Sheet: Sheet1
OTU ID	HC	TMCD	p
OTU31 (Lachnospira)	0.00854989	0.00188829	<0.001
OTU52 (Lachnospiraceae_unclassified)	0.00411913	0.0017176	<0.001
OTU64 (Granulicatella)	2.76e-05	4.47e-05	0.01
OTU73 (Lachnospira)	0.0038488	0.0001578	<0.001
OTU92 (Streptococcus)	0.000341933	0.000521	0.004
OTU108 (Solobacterium)	1.07778e-05	6.15e-05	<0.001
OTU135 (Lachnospiraceae_unclassified)	0.00139	0.000500378	<0.001
OTU148 (Pseudomonas)	2.88889e-07	0.000128	<0.001
Table S13: The relative abundance of eight obtained OTUs in TMCD and HC groups.
