# Supplementary material for: Characterization and diagnostic value of the gut microbial composition in patients with minimal change disease
Source: Front Physiol. 2022 Dec 6;13:1070569. doi: 10.3389/fphys.2022.1070569 (PMC9763583; doi:10.3389/fphys.2022.1070569)
Supplement: Supplementary file 21 [file Table7.xlsx]

## Sheet: Sheet1
OTU ID	HC_test	UMCD_test	p
OTU31 (Lachnospira)	0.0369027	0.00273207	0.003
OTU52 (Lachnospiraceae_unclassified)	0.00773	0.00247257	0.02
OTU64 (Granulicatella)	4.4e-06	7.42e-05	0.02
OTU73 (Lachnospira)	0.006389	0.00128	0.621
OTU92 (Streptococcus)	0.000107533	0.000597	0.026
OTU108 (Solobacterium)	2.33333e-06	0.000179786	0.046
OTU135 (Lachnospiraceae_unclassified)	0.00192	0.000340286	0.004
OTU148 (Pseudomonas)	0	0.000451643	0.008
Table S7: The relative abundance of eight obtained OTUs in UMCD and HC groups in validation cohort.
