# Supplementary material for: Characterization and diagnostic value of the gut microbial composition in patients with minimal change disease
Source: Front Physiol. 2022 Dec 6;13:1070569. doi: 10.3389/fphys.2022.1070569 (PMC9763583; doi:10.3389/fphys.2022.1070569)
Supplement: Supplementary file 22 [file Table8.xlsx]

## Sheet: Sheet1
Group	JN_MCD	HC	Total	P-value
Population	10	10	20
Gender (Male.1)	4	6	10	0.656
Age	38.2±15.3	41.5±13.9	42 (25.8, 54)
Table S8. Matched gender and age profiles in JN_MCDs and HCs.
